# Supplementary material for: Disaggregation of a sumanene-containing fluorescent probe towards highly sensitive and specific detection of caesium cations
Source: Royal Society of Chemistry journal article supplement (doi:10.1039/d0cc07226e), 2020-12-10
Supplement: d0cc07226e1.pdf [file d0cc07226e1.pdf]

# Disaggregation of sumanene-containing fluorescent probe towards highly sensitive and specific detection of caesium cation

Artur Kasprzak<sup>a\*</sup> and Hidehiro Sakurai<sup>b</sup>

<sup>a</sup> Faculty of Chemistry, Warsaw University of Technology, Noakowskiego Str. 3, 00-664 Warsaw, Poland

\* corresponding author e-mail: [akasprzak@ch.pw.edu.pl](mailto:akasprzak@ch.pw.edu.pl)

<sup>b</sup> Division of Applied Chemistry Graduate School of Engineering, Osaka University, 2-1 Yamadaoka, Suita, Osaka 565-0871, Japan

## Electronic Supplementary Information (ESI)

### Table of contents

|      |                                                                                    |    |
|------|------------------------------------------------------------------------------------|----|
| S1.  | Experimental section .....                                                         | 2  |
| S1.1 | Materials and methods .....                                                        | 2  |
| S1.2 | Synthesis of 1-(4-formylphenyl)-3,5-diphenylbenzene ( <b>3</b> ) .....             | 2  |
| S1.3 | Synthesis of sumanene derivative <b>5</b> .....                                    | 3  |
| S1.4 | Photophysical studies on <b>5</b> and Cs <sup>+</sup> recognition assay .....      | 3  |
| S2.  | NMR spectra.....                                                                   | 4  |
| S3.  | Emission spectra .....                                                             | 6  |
| S4.  | Estimation of the emission quantum yields regarding AIEE studies .....             | 12 |
| S5.  | DLS analysis .....                                                                 | 13 |
| S6.  | Job's plot analysis on the interactions between <b>5</b> and Cs <sup>+</sup> ..... | 14 |
| S7.  | Selectivity studies on the interactions between <b>5</b> and Cs <sup>+</sup> ..... | 15 |
| S8.  | Reversibility studies.....                                                         | 16 |
| S9.  | Calculation of the binding constant .....                                          | 17 |
| S10. | References.....                                                                    | 18 |

## S1. Experimental section

### S1.1 Materials and methods

Chemical reagents and solvents were commercially purchased and purified according to the standard methods, if necessary. The NMR experiments were carried out using a Varian VNMRs 500 MHz spectrometer ( $^1\text{H}$  NMR at 500 MHz or  $^{13}\text{C}$  NMR at 125 MHz) equipped with a multinuclear z-gradient inverse probe head. Unless otherwise stated, the spectra were recorded at 25 °C. Standard 5 mm NMR tubes were used.  $^1\text{H}$  and  $^{13}\text{C}$  chemical shifts ( $\delta$ ) were reported in parts per million (ppm) relative to the solvent signal:  $\text{CDCl}_3$ ,  $\delta_{\text{H}}$  (residual  $\text{CHCl}_3$ ) 7.26 ppm,  $\delta_{\text{C}}$  77.2 ppm. NMR spectra were analyzed with the MestReNova v12.0 software (Mestrelab Research S.L). UV-Vis and PL measurements were performed with a Cytation 3 Cell Multi-Mode Reader (BioTek Instruments, Inc.) with the spectral resolution of 1 nm. For the UV-Vis and PL measurements, the wavelengths for the absorption or emission maxima  $\lambda_{\text{max}}$  were reported in nm. TOF-HRMS (ESI) measurements were performed with a Q-Exactive ThermoScientific spectrometer. Melting point was determined on Standford Research Systems MPA 100 and was uncorrected. Dynamic light scattering (DLS) measurements were performed using Malvern Zetasizer instrument. Elemental analyses were performed using CHNS Elemental Vario EL III apparatus. Each elemental composition was reported as an average of two analyses. TLC analysis was performed using Merck Silica gel 60 F254 plates.

3,5-Diphenylbromobenzene<sup>1</sup> and sumanene<sup>2</sup> were prepared following the literature procedures.

### S1.2 Synthesis of 1-(4-formylphenyl)-3,5-diphenylbenzene (3)

Phenylboronic acid (100.0 mg, 0.358 mmol, 110 mol%), 3,5-diphenylbromobenzene (54.0 mg, 0.325 mmol, 100 mol%),  $\text{Pd}(\text{PPh}_3)_4$  (40 mg, 0.033 mmol, 10 mol%) and 2M  $\text{Na}_2\text{CO}_3$  (0.5 mL) were refluxed in dry THF (5 mL) under argon atmosphere for 12 hours. Distilled water (5 mL) was added. Water layer was extracted with  $\text{CHCl}_3$  (3x25 mL). The organic layers were combined, washed with brine (3 mL), dried with  $\text{MgSO}_4$ , filtered, and the solvent was removed in vacuum. The resultant residue was purified by column chromatography ( $\text{SiO}_2$ ; 40% hex/ $\text{CH}_2\text{Cl}_2$ ) to give 1-(4-formylphenyl)-3,5-diphenylbenzene (**3**; 84.7 mg, 78% yield) as the white solid.

The NMR data are consistent with the literature.<sup>3</sup>

$^1\text{H}$  NMR ( $\text{CDCl}_3$ , 500 MHz, ppm),  $\delta_{\text{H}}$  10.09 (s, 1H), 8.01-7.99 (m, 2H), 7.89-7.85 (m, 3H), 7.82-7.81 (m, 2H), 7.72-7.70 (m, 4H), 7.52-7.49 (m, 4H), 7.43-7.40 (m, 2H);  $^{13}\text{C}\{^1\text{H}\}$  NMR ( $\text{CDCl}_3$ , 125 MHz, ppm),  $\delta_{\text{C}}$  192.1, 147.3, 142.8, 141.1, 141.0, 135.6, 130.5, 129.1, 128.1, 128.0, 127.5, 126.5, 125.4; TOF-HRMS (ESI): calcd. for  $\text{C}_{25}\text{H}_{19}\text{O}$   $[\text{M}+\text{H}]^+ = 335.1431$ , found:  $m/z$  335.1429; Elemental analysis: calculated: C, 88.79; H, 5.43; N, 0.00%; found: C, 88.72; H, 5.45; N, 0.00%;  $R_f$  (40% hex/ $\text{CH}_2\text{Cl}_2$ ) = 0.75.

### S1.3 Synthesis of sumanene derivative 5

Sumanene (**4**; 10.0 mg, 0.038 mmol, 100 mol%) and Bu<sub>4</sub>NBr (12.0 mg, 0.019 mmol, 50 mol%) were added to a test tube. The reaction flask was purged with argon. Dry THF (0.3 mL) and 30% NaOH<sub>aq</sub> (2 mL in degassed water) were added. The reaction mixture was stirred for 5 minutes at 27 °C. A solution of 1-(4-formylphenyl)-3,5-diphenylbenzene (**3**; 63.5 mg, 0.19 mmol, 500 mol%) in dry THF (0.8 mL) was added and the mixture was stirred under argon atmosphere at 27 °C for 24 hours. Distilled water (6 mL) was added. Water layer was extracted with CH<sub>2</sub>Cl<sub>2</sub> (3x20 mL). The organic layers were combined and washed with saturated NaHCO<sub>3</sub> (3 mL), brine (3 mL), dried with MgSO<sub>4</sub>, filtered, and the solvent was removed in vacuum. The resultant residue was purified by PTLC (50% hex/CH<sub>2</sub>Cl<sub>2</sub>) to give the target sumanene derivative (**5**; 33.6 mg, 73% yield) as the light-orange solid.

Mp: >300 °C; <sup>1</sup>H NMR (CDCl<sub>3</sub>, 500 MHz, ppm), δ<sub>H</sub> 8.07-8.03 (m, 3H), 8.00-7.96 (m, 3H), 7.91-7.69 (m, 28H), 7.60-7.57 (m, 1H), 7.53-7.36 (m, 24H), 7.32-7.31 (m, 1H); <sup>13</sup>C{<sup>1</sup>H} NMR (CDCl<sub>3</sub>, 125 MHz, ppm), δ<sub>C</sub> 147.8, 147.7, 147.5, 147.4, 146.2, 145.8, 145.7, 145.5, 147.7, 142.6, 142.5, 141.7, 141.7, 141.6, 141.6, 141.4, 141.2, 141.1, 141.0, 140.9, 140.7, 135.8, 135.7, 135.6, 132.7, 130.5, 130.4, 129.2, 129.1, 129.0, 128.9, 128.8, 127.8, 127.7, 127.6, 127.5, 127.4, 125.7, 125.6, 125.2, 125.1, 123.9, 123.7, 123.6, 123.4, 121.2, 121.1, 121.0, 120.9; UV-Vis, λ<sub>max</sub> (CHCl<sub>3</sub>) 260, 366, 478 nm; HRMS (TOF): calcd. for C<sub>96</sub>H<sub>60</sub> [M]<sup>+</sup> = 1212.4695, found: m/z 1212.4700; Elemental analysis: calculated: C, 95.02; H, 4.98; N, 0.00%; found: C, 95.05; H, 4.95; N, 0.00%; R<sub>f</sub> (50% hex/CH<sub>2</sub>Cl<sub>2</sub>) = 0.50.

### S1.4 Photophysical studies on 5 and Cs<sup>+</sup> recognition assay

The concentration of the samples for UV-Vis and PL analyses was 2·10<sup>-5</sup> M.

For the aggregation formation studies, the PL spectra were measured in CHCl<sub>3</sub>-hex or CHCl<sub>3</sub>-CH<sub>3</sub>OH mixtures with different volume fractions of poor solvent. Stock solution of **5** in CHCl<sub>3</sub> was prepared. An aliquot of the stock solution was transferred to a vial. Poor solvent (hex or CH<sub>3</sub>OH) was added to furnish 2·10<sup>-5</sup> M mixtures in which the poor solvent fraction was 0–95 vol%. These mixtures were intensively shaken (450 rpm) for ca. 6 minutes before the measurement.

For the metal recognition studies, the PL spectra were measured in mixtures with 95 vol% of MeOH in the presence of given metal nitrate (CsNO<sub>3</sub>, NaNO<sub>3</sub>, RbNO<sub>3</sub>, Ba(NO<sub>3</sub>)<sub>2</sub>, KNO<sub>3</sub>, Mg(NO<sub>3</sub>)<sub>2</sub> or LiNO<sub>3</sub>).

The PL experiments were repeated three times to check the reproducibility of the results.

## S2. NMR spectra

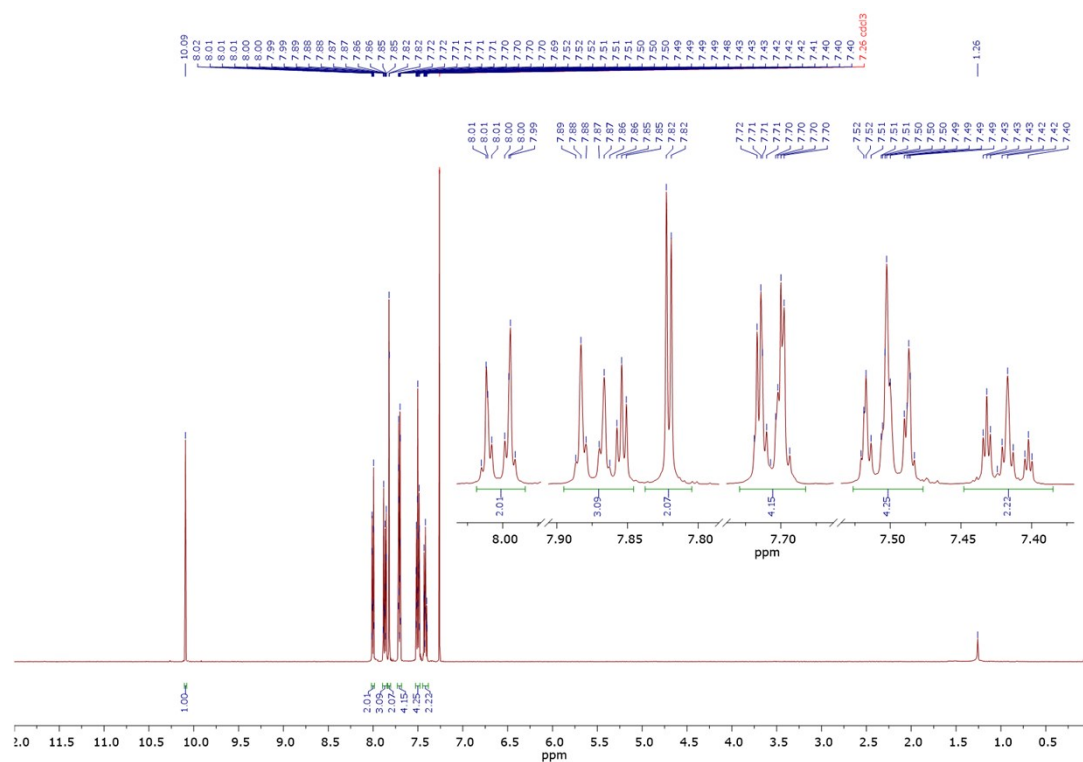

**Figure S1.** <sup>1</sup>H NMR (CDCl<sub>3</sub>, 500 MHz) spectrum of 1-(4-formylphenyl)-3,5-diphenylbenzene (**3**).

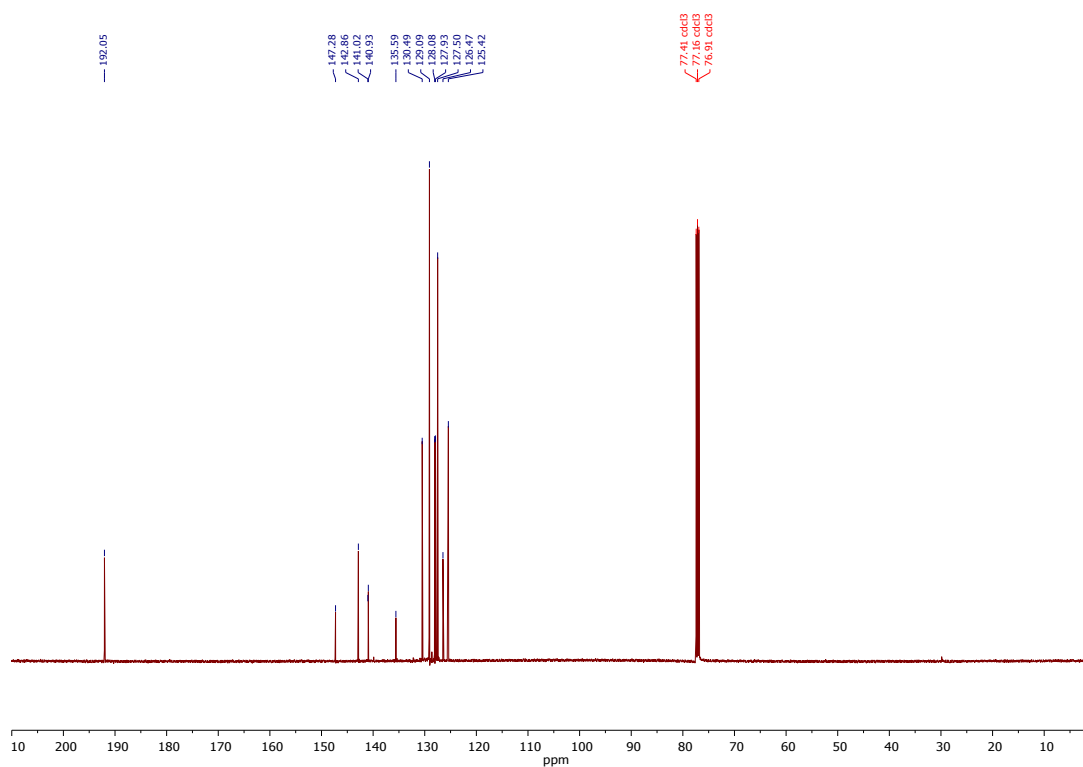

**Figure S2.** <sup>13</sup>C NMR (CDCl<sub>3</sub>, 125 MHz) spectrum of 1-(4-formylphenyl)-3,5-diphenylbenzene (**3**).

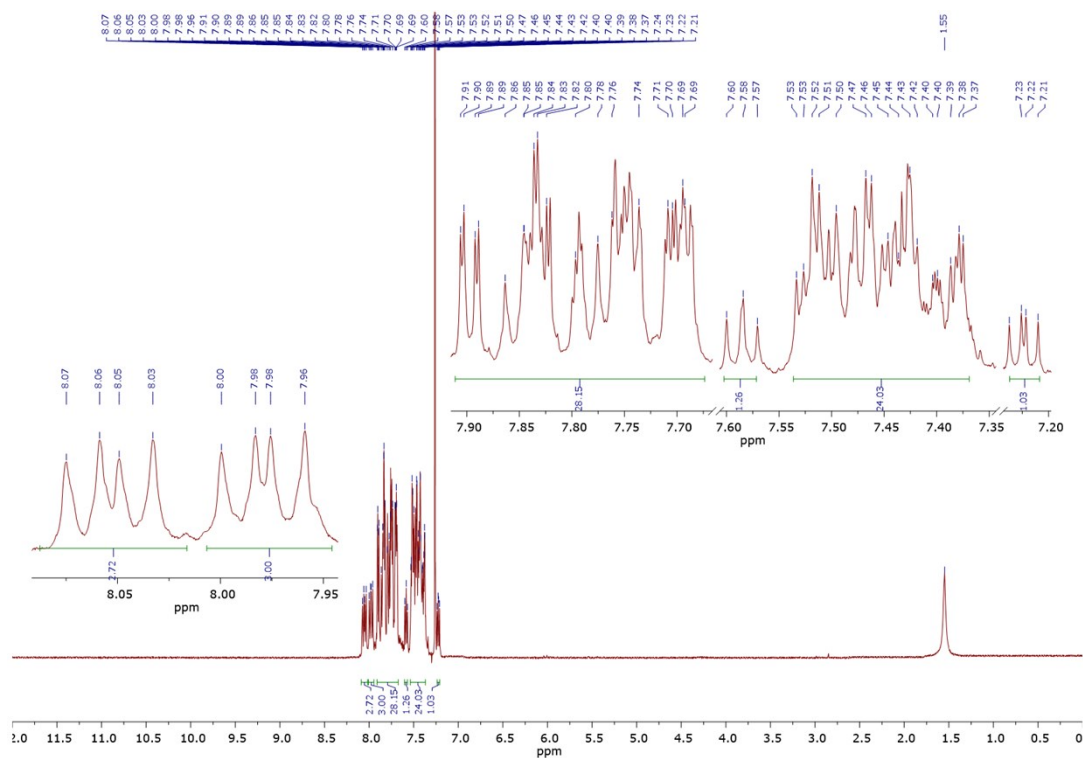

**Figure S3.** <sup>1</sup>H NMR (CDCl<sub>3</sub>, 500 MHz) spectrum of sumanene derivative **5**.

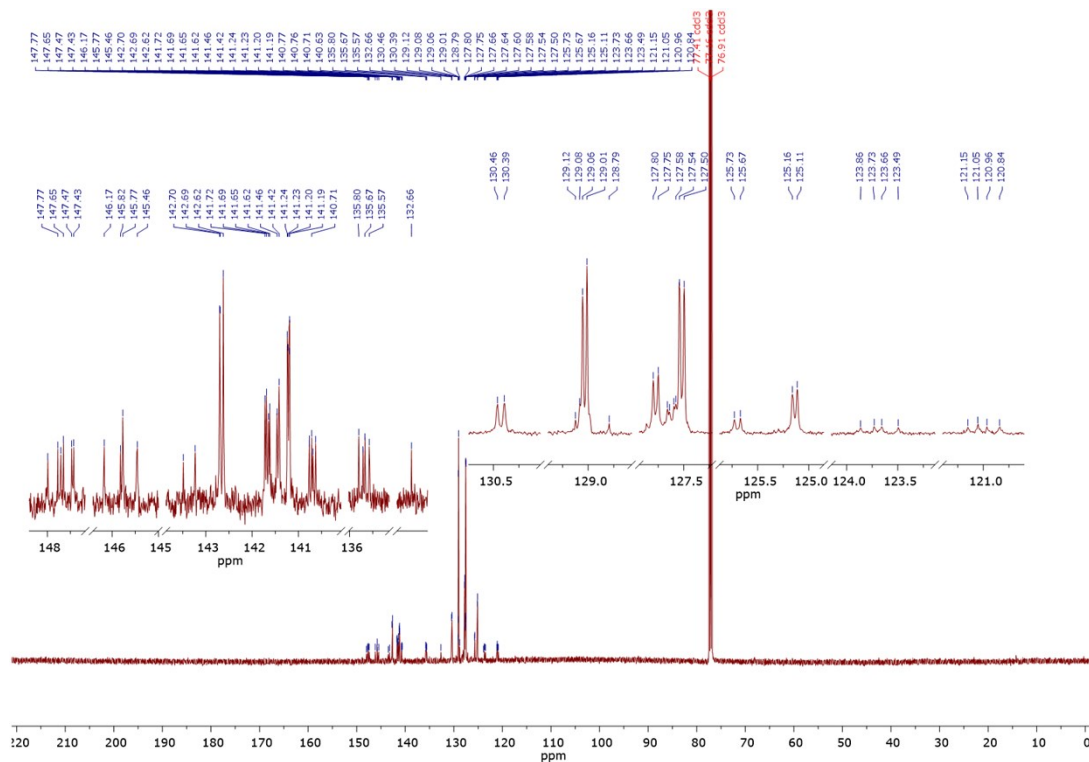

### S3. Emission spectra

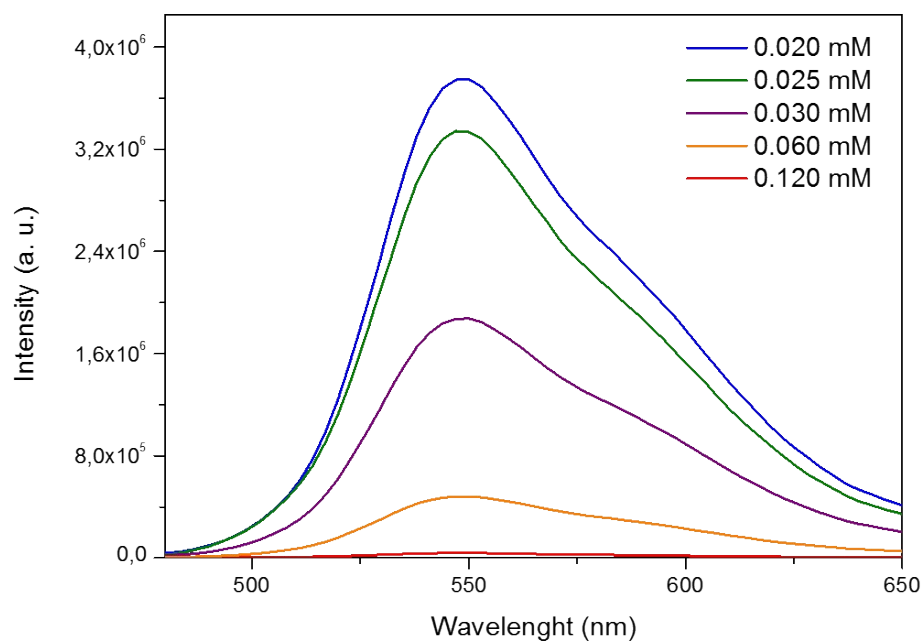

**Figure S5.** Concentration dependent emission spectra of **3** ( $\text{CHCl}_3$ ,  $2 \cdot 10^{-5} \text{ M}$ ;  $\lambda_{\text{ex}} = 360 \text{ nm}$ ).

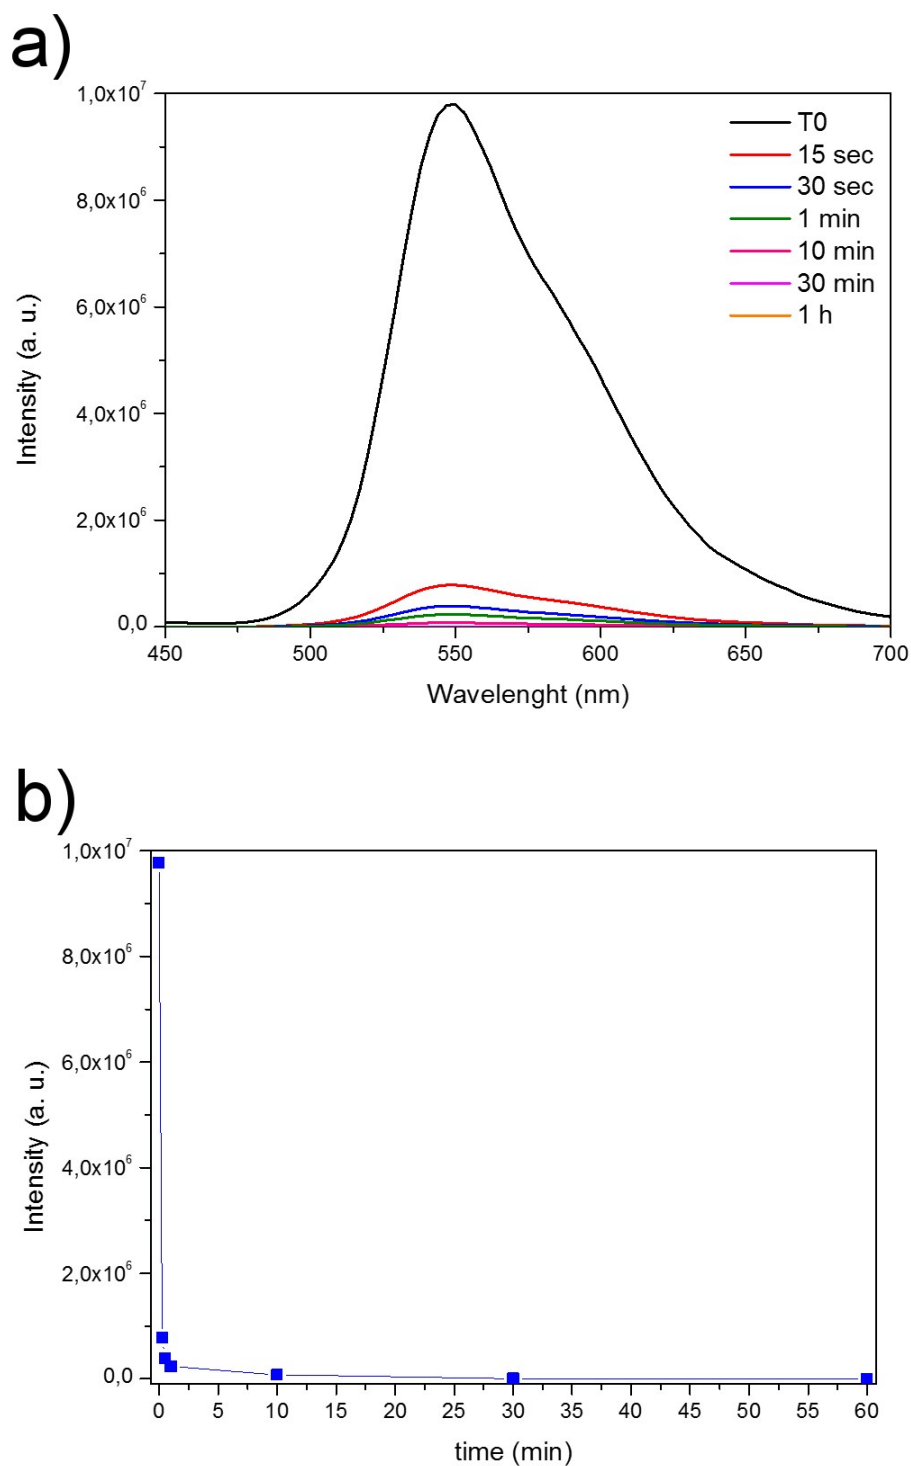

**Figure S6.** (a) Emission spectra of **5** ( $\lambda_{ex} = 360$  nm) measured in different  $\text{CHCl}_3$ -hex compositions; (b) Changes in the emission intensity ( $\lambda_{em} = 548$  nm) for the samples with different vol% of poor solvent (hex). For (a) the annotation stands for the volumetric ratio of poor solvent in each mixture. Black dotted lines in (a) indicate the emission spectrum for lyophilized aggregates. For (b) error bars are also shown. Concentration of the samples:  $2 \cdot 10^{-5}$  M.

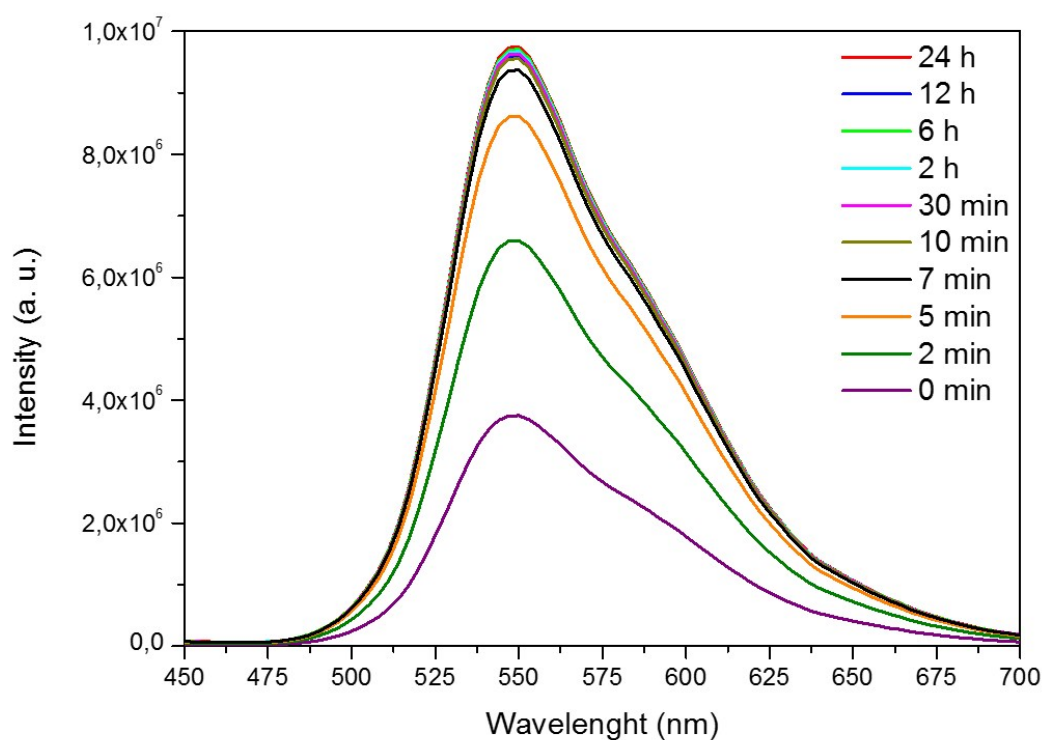

**Figure S7.** Time-dependent emission intensity change of the aggregated compound (95 vol% CH<sub>3</sub>OH in CHCl<sub>3</sub>;  $2 \cdot 10^{-5}$  M;  $\lambda_{\text{ex}} = 360$  nm).



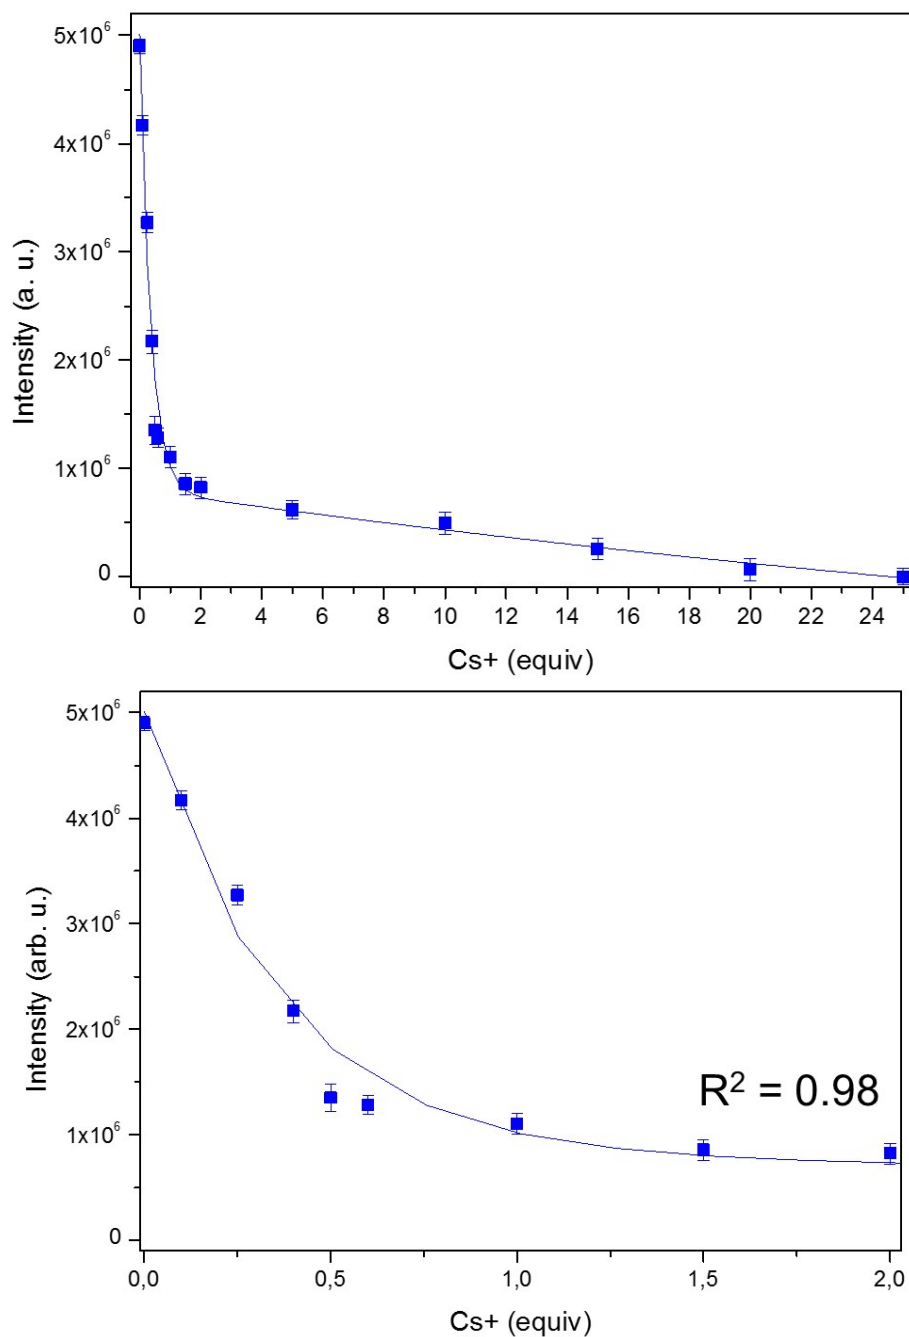

**Figure S8.** Changes in the emission intensity ( $\lambda_{\text{em}} = 548 \text{ nm}$ ) for the samples comprising various amounts (equiv) of  $\text{Cs}^+$ . The inset of the graph is also presented (bottom).

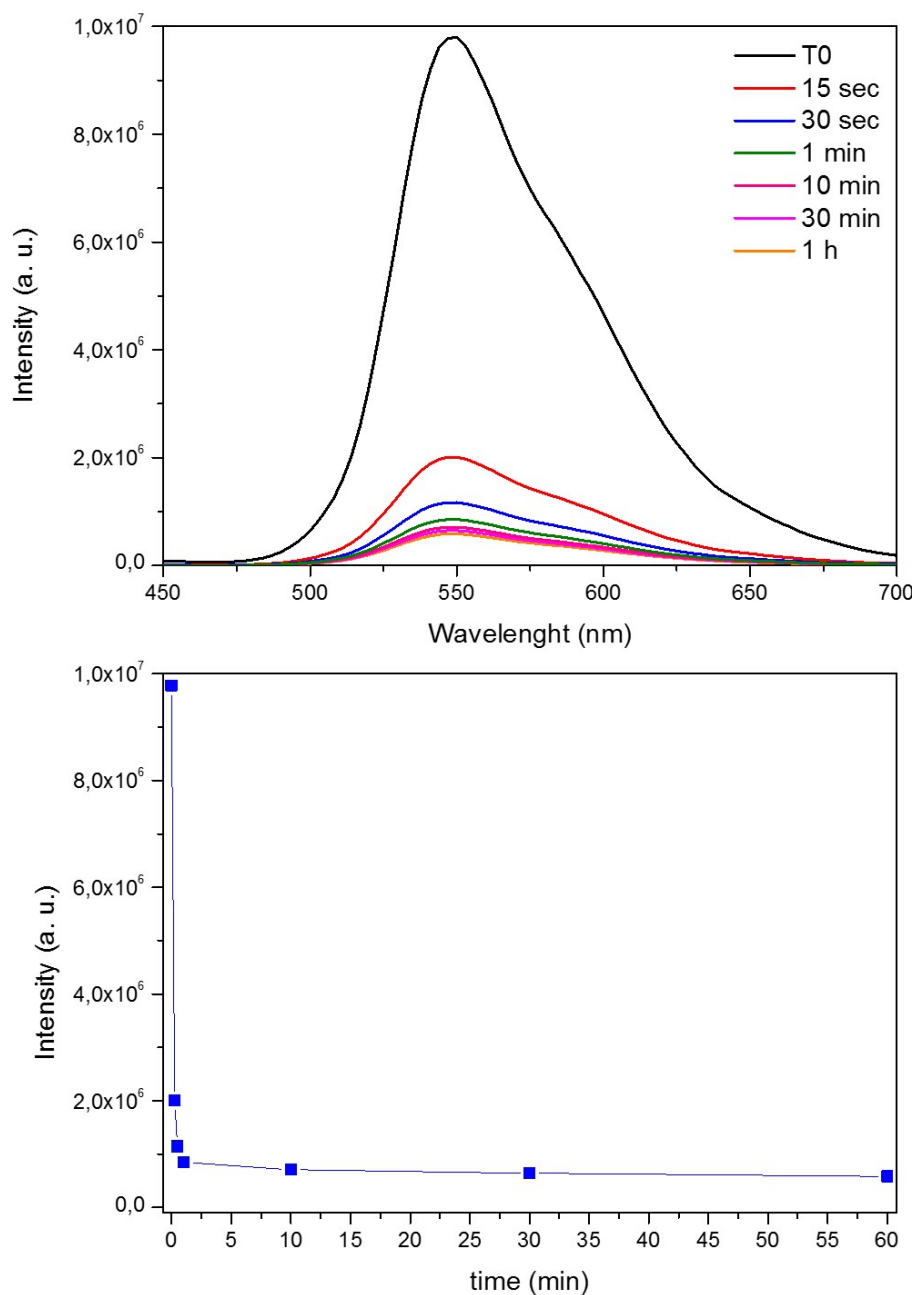

**Figure S9. (Top)** Time-course emission spectra of aggregated **5** ( $\lambda_{\text{ex}} = 360$  nm) in the presence 2 equiv of  $\text{Cs}^+$ . Concentration of the sample:  $2 \cdot 10^{-5}$  M.; **(Bottom)** Changes in the emission intensity ( $\lambda_{\text{em}} = 548$  nm) for the time-course emission studies with 2 equiv of  $\text{Cs}^+$ . Concentration of the sample:  $2 \cdot 10^{-5}$  M.

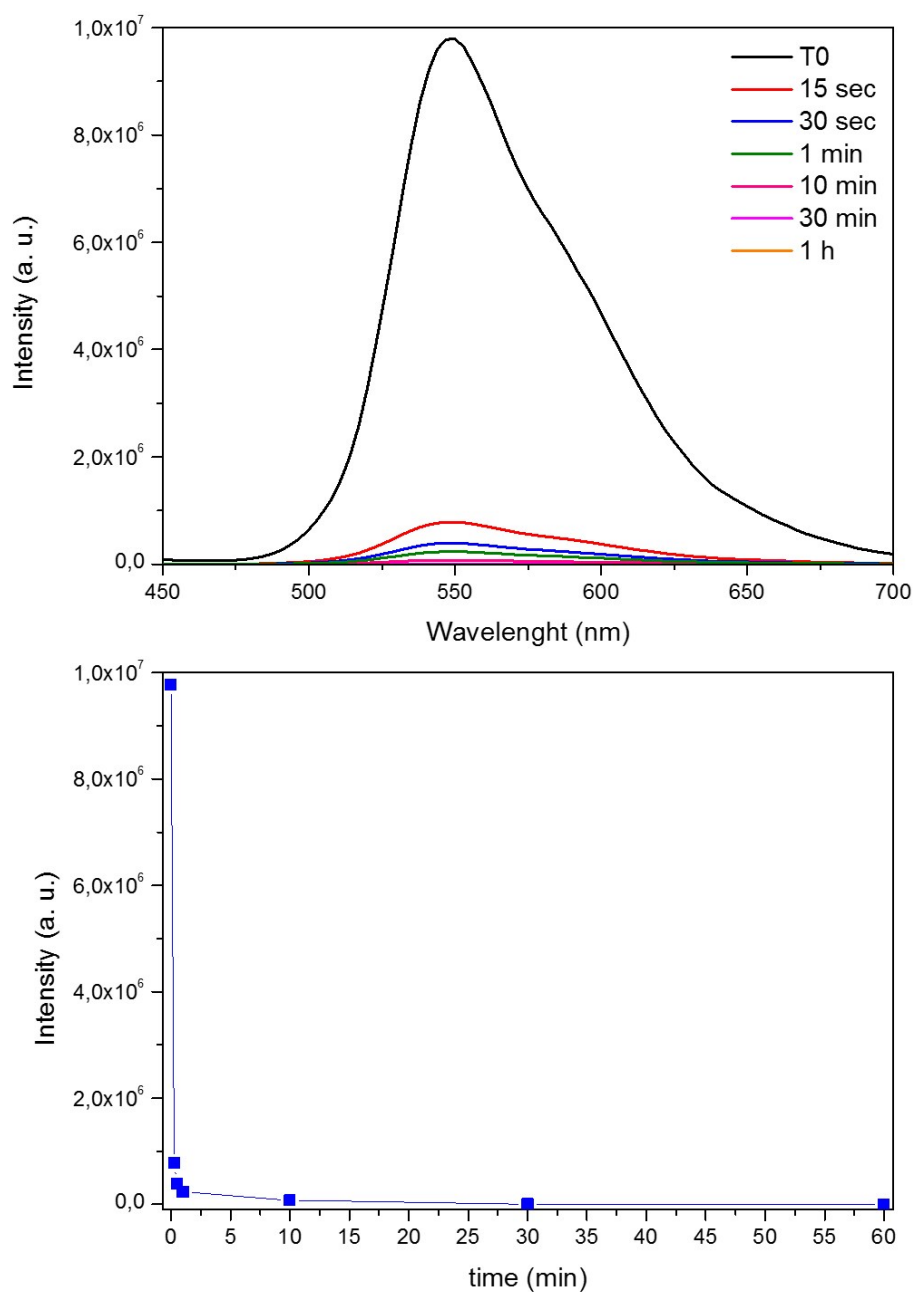

**Figure S10. (Top)** Time-course emission spectra of aggregated **5** ( $\lambda_{\text{ex}} = 360$  nm) in the presence 25 equiv of  $\text{Cs}^+$ ; **(Bottom)** Changes in the emission intensity ( $\lambda_{\text{em}} = 548$  nm) for the time-course emission studies. Concentration of the sample:  $2 \cdot 10^{-5}$  M.

#### S4. Estimation of the emission quantum yields regarding AIEE studies

Emission quantum yields ( $\Phi_E$ ) were estimated using a relative method.<sup>4</sup> The concentration of the samples was  $1 \cdot 10^{-6}$  M. Excitation wavelength was 360 nm. Experiments were performed at room temperature. Rhodamine 6G was used as a standard.<sup>5</sup> The following equation was applied for the calculation of  $\Phi_E$ :

$$\Phi_E = \Phi_s \frac{\int I(\tilde{\nu}) d\tilde{\nu} \frac{1 - e^{-A_s}}{n^2}}{\int I_s(\tilde{\nu}) d\tilde{\nu} \frac{1 - e^{-A}}{n_s^2}}$$

where  $\Phi_s$  stands for the fluorescence quantum yield of standard (Rhodamine 6G;  $\Phi_s = 95\%$ <sup>5</sup>),  $I(\tilde{\nu})$  and  $I_s(\tilde{\nu})$  are the intensities of the sample and standard, respectively;  $A$  and  $A_s$  are the absorbances of the sample and standard, respectively, at the wavelength at which excitation of the compound has occurred; and  $n$  is the solvent refractive index (weighted arithmetic mean was calculated for  $\text{CHCl}_3$ -hexane and  $\text{CHCl}_3$ - $\text{CH}_3\text{OH}$  mixtures with weights equal to vol% of components of the mixtures).

The results of the estimation of  $\Phi_E$  are summarized below in Table S1.

**Table S1.** Summary of the estimated emission quantum yields ( $\Phi_E$ ).

| CHCl <sub>3</sub> -hexane mixtures |               |            | CHCl <sub>3</sub> - CH <sub>3</sub> OH mixtures |                           |            |
|------------------------------------|---------------|------------|-------------------------------------------------|---------------------------|------------|
| Entry                              | Vol% (hexane) | $\Phi_E^a$ | Entry                                           | Vol% (CH <sub>3</sub> OH) | $\Phi_E^a$ |
| 1                                  | 0             | 40%        | 1                                               | 0                         | 42%        |
| 2                                  | 5             |            | 2                                               | 5                         |            |
| 3                                  | 10            |            | 3                                               | 10                        |            |
| 4                                  | 15            | 42%        | 4                                               | 15                        | 44%        |
| 5                                  | 20            |            | 5                                               | 20                        |            |
| 6                                  | 30            |            | 6                                               | 30                        |            |
| 7                                  | 40            | 43%        | 7                                               | 40                        | 47%        |
| 8                                  | 50            |            | 8                                               | 50                        |            |
| 9                                  | 60            | 45%        | 9                                               | 60                        | 51%        |
| 10                                 | 70            | 64%        | 10                                              | 70                        | 67%        |
| 11                                 | 80            | 77%        | 11                                              | 80                        | 82%        |
| 12                                 | 90            | 86%        | 12                                              | 90                        | 90%        |
| 13                                 | 95            | 89%        | 13                                              | 95                        | 92%        |

<sup>a</sup> estimated by the relative method.

## S5. DLS analysis

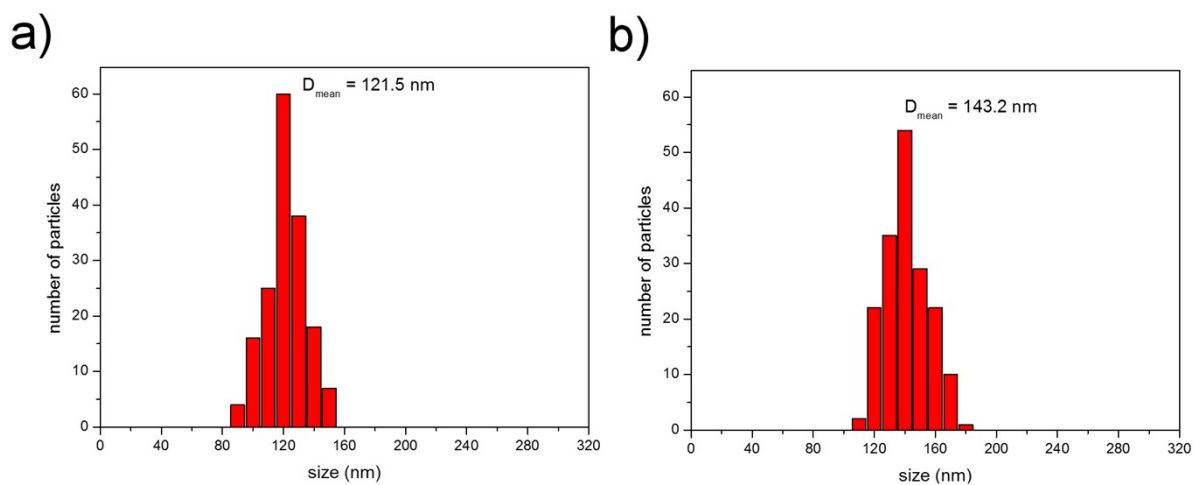

**Figure S11.** (a) DLS profile for the aggregates obtained from  $\text{CHCl}_3$ - $\text{CH}_3\text{OH}$  mixture with 95 vol% of poor solvent (hex); (b) DLS profile for the aggregates obtained from  $\text{CHCl}_3$ - $\text{CH}_3\text{OH}$  mixture with 95 vol% of poor solvent ( $\text{CH}_3\text{OH}$ ).

**S6. Job's plot analysis on the interactions between 5 and Cs<sup>+</sup>**

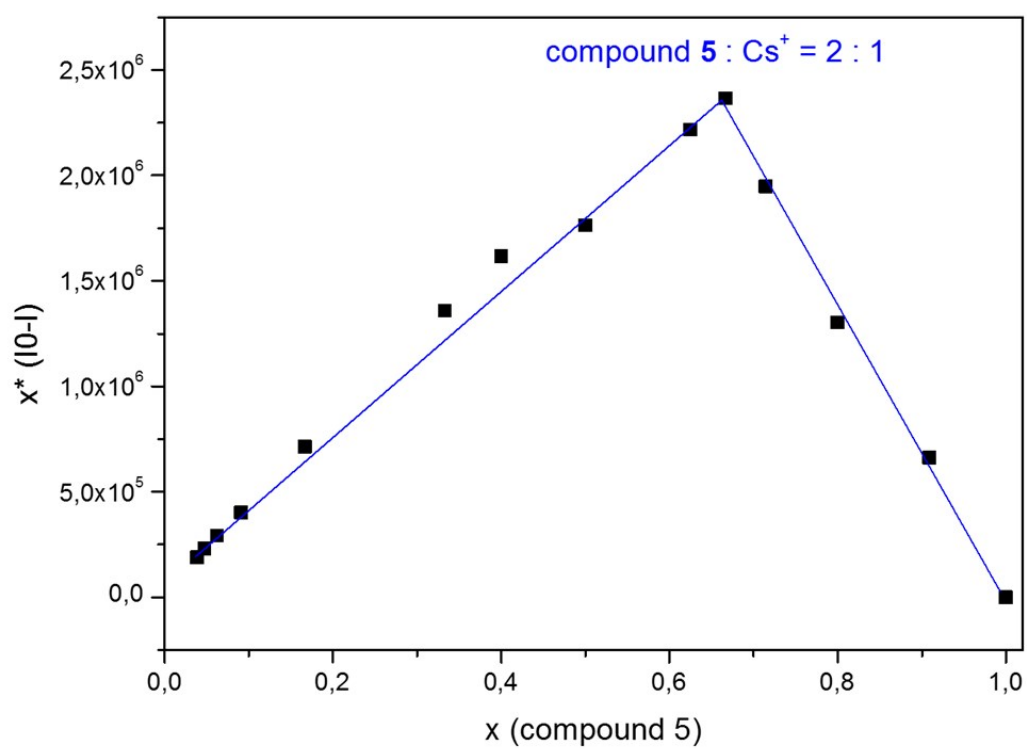

**Figure S12.** Job's plot regarding the studied interactions between 5 and Cs<sup>+</sup>.

## S7. Selectivity studies on the interactions between **5** and Cs<sup>+</sup>

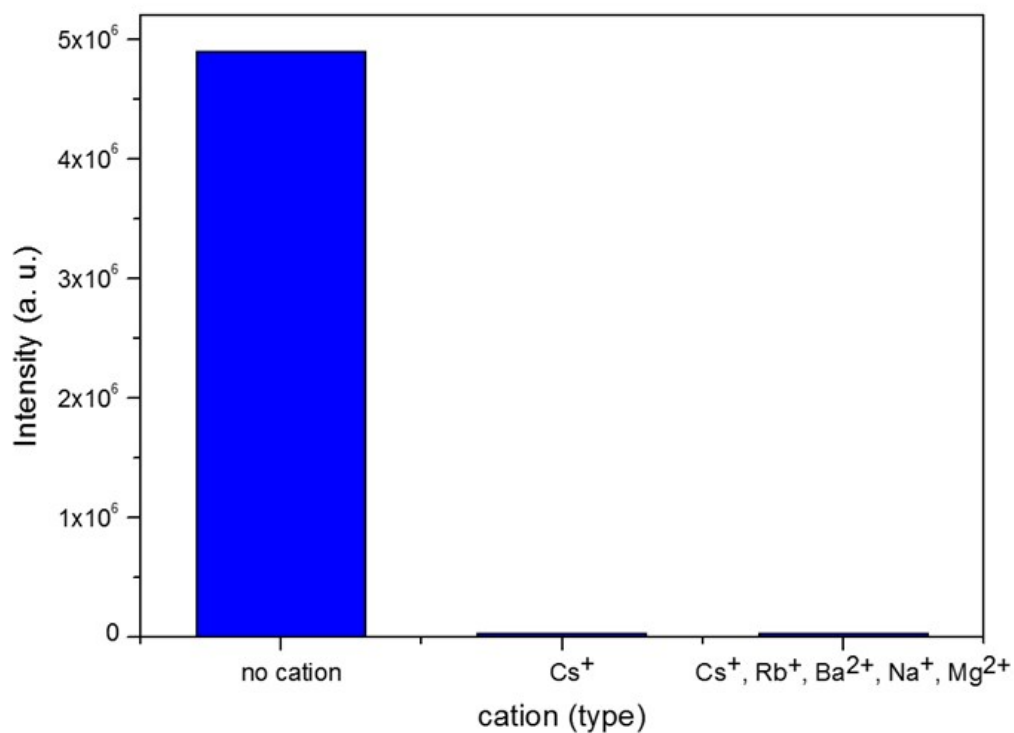

**Figure S13.** Comparison between emission intensity ( $\lambda_{\text{em}} = 548 \text{ nm}$ ) changes of aggregated **5** upon the addition of Cs<sup>+</sup> (25 equiv) and Cs<sup>+</sup> (25 equiv) in the presence of other cations (Rb<sup>+</sup>, Ba<sup>2+</sup>, Na<sup>+</sup>, Mg<sup>2+</sup>).

## S8. Reversibility studies

To perform the reversibility studies, the following procedure was applied:

1. The sample after the treatment of aggregated **5** ( $\text{CHCl}_3$ - $\text{CH}_3\text{OH}$  mixture with 95 vol% of poor solvent) with 2.0 equiv of  $\text{Cs}^+$  was centrifuged (10000 rpm, 10 min). The supernatant was precisely removed.
2. The obtained solid was suspended in 2 mL of  $\text{CHCl}_3$ - $\text{CH}_3\text{OH}$  (95 vol% of MeOH). The sample was intensively shaken for 1 hour (450 rpm) and centrifuged (10000 rpm, 10 min). The supernatant was precisely removed.
3. Step 3 was repeated three more times.
4. The obtained solid was subjected to the emission spectra measurement ( $\lambda_{\text{ex}} = 548 \text{ nm}$ ) in the presence or absence of 2.0 equiv of  $\text{Cs}^+$ . The results are presented in **Fig. S14**.

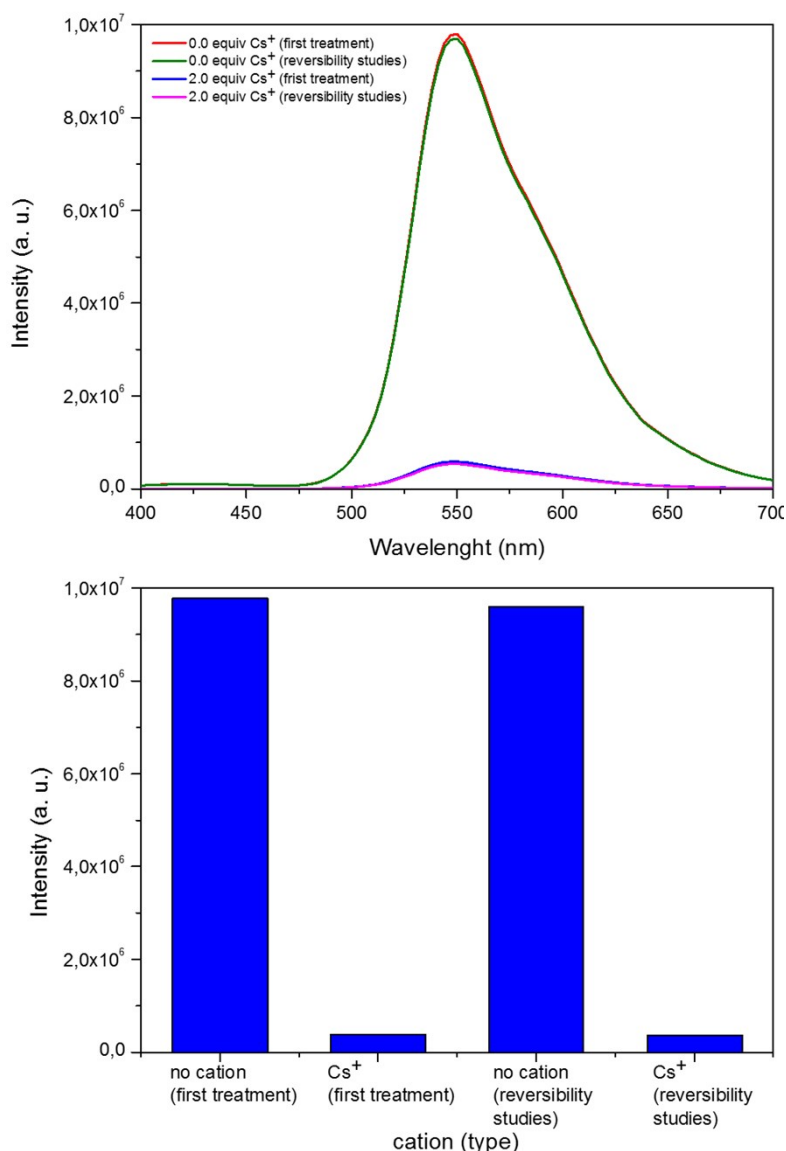

**Figure S14.** Results of the reversibility studies with aggregated **5**: **(top)** emission spectra (95 vol%  $\text{CH}_3\text{OH}$  in  $\text{CHCl}_3$ ;  $2 \cdot 10^{-5} \text{ M}$ ;  $\lambda_{\text{ex}} = 360 \text{ nm}$ ); **(bottom)** emission intensity ( $\lambda_{\text{em}} = 548 \text{ nm}$ ) changes aggregated **5** upon the addition of  $\text{Cs}^+$  (2.0 equiv).



## S9. Calculation of binding constant

The association constant was determined with Benesi-Hildebrand equation:

$$\frac{1}{I - I_0} = \frac{1}{a} + \frac{1}{a \cdot K_a \cdot C(\text{Cs}^+)}$$

where  $I_0$  and  $I$  are the fluorescence intensities of **5** in the absence and presence of  $\text{Cs}^+$ , respectively, and  $a$  is a constant,  $K_a$  is the association constant,  $C(\text{Cs}^+)$  is the concentration of  $\text{Cs}^+$  in solution. The association constant was determined as a ratio of intercept-to-slope of  $1/(I - I_0)$  vs.  $1/C(\text{Cs}^+)$  linear plot (Fig. S15).  $R^2$  value for this linear plot was 0.9922.

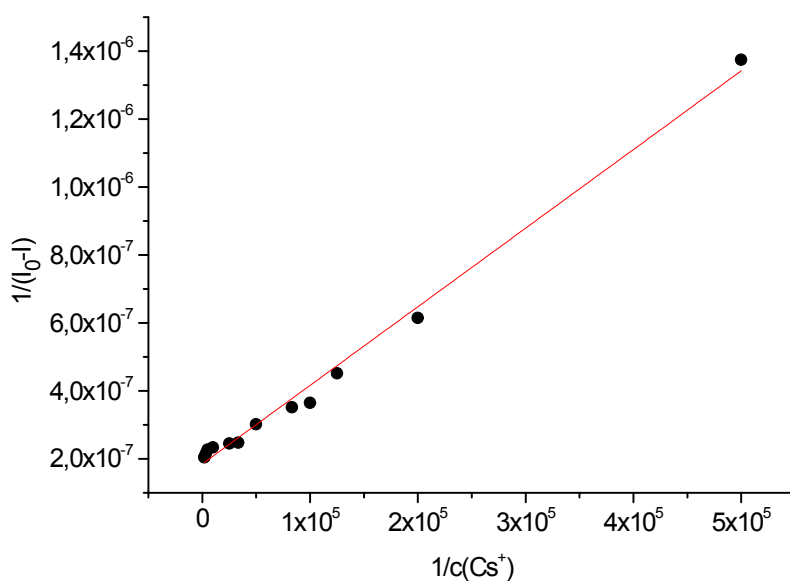

**Figure S15.** Benesi–Hildebrand plot from emission spectra data of aggregated **5** in the presence of  $\text{Cs}^+$ .

## S10. References

1. M. Jung, J. Lee, H. Jung, S. Kang, A. Wakamiya, J. Park. *Dyes Pigm.*, **2018**, 158, 42-49.
2. H. Sakurai, T. Daiko, T. Hirao. *Science*, **2003**, 301, 1878.
3. J. Yang, Q. Guo, J. Wang, Z. Ren, J. Chen, Q. Peng, D. Ma, Z. Li. *Adv. Opt. Mater.*, **2018**, 6, article no.1800342.
4. For the details of this methodology, see: M. Urban, K. Durka, P. Jankowski, J. Serwatowski, S. Lulinski, *J. Org. Chem.*, **2017**, 82, 8234.
5. According to IUPAC data, see: A. M. Brouwer, *Pure Appl. Chem.*, **2011**, 83, 2213.
